# Supplementary material
Source: PubMed Central journal article supplement (PMC6583835)
Supplement: jamasurg-e190512-s001.pdf [file jamasurg-e190512-s001.pdf]

## Supplementary Online Content

Kulkarni S, Ladin K, Haakinson D, Greene E, Li L, Deng Y. Association of racial disparities with access to kidney transplant after the implementation of the new Kidney Allocation System. *JAMA Surg*. Published online April 3, 2019. doi:10.1001/jamasurg.2019.0512

**eTable 1.** Table for testing whether the effect of covariates varies across transitions

**eTable 2.** Final full model: parameter estimates and standard errors for all covariates and all transitions

This supplementary material has been provided by the authors to give readers additional information about their work.

**eTable 1.** Table for testing whether the effect of covariates varies across transitions

| Number | Model <sup>¶</sup>                             | Log-likelihood | Likelihood ratio statistics <sup>§</sup> | Degrees of freedom | P value | AIC      |
|--------|------------------------------------------------|----------------|------------------------------------------|--------------------|---------|----------|
| 1      | Null model                                     | -422908.2      |                                          |                    |         | 845862.4 |
| 2      | gender                                         | -422876.9      | 62.55245                                 | 6                  | <0.0001 | 845811.9 |
| 3      | diabetes                                       | -422279.9      | 1256.593                                 | 6                  | <0.0001 | 844617.8 |
| 4      | age                                            | -422314.7      | 1187.063                                 | 6                  | <0.0001 | 844687.4 |
| 5      | Initial CPRA                                   | -422793.9      | 228.5495                                 | 18                 | <0.0001 | 845669.9 |
| 6      | dialysis                                       | -422012.7      | 1790.996                                 | 6                  | <0.0001 | 844083.4 |
| 7      | ABO                                            | -422684.1      | 448.1393                                 | 18                 | <0.0001 | 845450.3 |
| 8      | race                                           | -422273.9      | 1238.525                                 | 18                 | <0.0001 | 844629.8 |
| 9      | region                                         | -421670.0      | 2476.461                                 | 50                 | <0.0001 | 843506   |
| 10     | Transition specific model for all covariates   | -419051.3      | 7713.823                                 | 138                | <0.0001 | 838424.6 |
| 11     | Model 10+CPRA*RACE interaction on transition 1 | -419043.0      | 16.6117                                  | 9                  | 0.0551  | 838426   |
| 12     | Model 10+CPRA*RACE interaction on transition 2 | -419045.2      | 12.27895                                 | 9                  | 0.1980  | 838430.3 |
| 13     | Model 10+CPRA*RACE interaction on transition 4 | -419047.8      | 6.978988                                 | 9                  | 0.6393  | 838435.6 |
| 14     | Model 10+CPRA*RACE interaction on transition 5 | -419046.0      | 10.58665                                 | 9                  | 0.3051  | 838432   |
| 15     | Model 10+CPRA*RACE interaction on transition 6 | -419049.0      | 4.535441                                 | 9                  | 0.8728  | 838438.1 |
| 16     | Model 10+CPRA*RACE interaction on transition 7 | -419047.3      | 8.075026                                 | 9                  | 0.5266  | 838434.5 |
| 17     | Final full model <sup>€</sup>                  | -419038.1      | 26.38023                                 | 9                  | 0.0017  | 838416.2 |

¥ Each covariate was sequentially allowed to differ across transitions by creating transition specific covariates, while the other covariates were kept identical across transition.

§ For model 2-10, the likelihood ratio statistics were calculated by comparing each model with Null model. For model 11-17, the likelihood ratio statistics were calculated by comparing each model with transition specific model 10.

€ The final full model is the transition specific model for all covariates (model 10) plus the interaction between CPRA and race for transition 3, which also provided the best fit using AIC criteria.

**eTable 2.** Final full model: parameter estimates and standard errors for all covariates and all transitions

|                                                 | Transition 1:<br>Active->inactive |      |      | Transition2:<br>Active->lving TX |      |      | Transition 3:<br>Active->deceased TX |      |        | Transition 4:<br>Active->death/other |      |      | Transition 5:<br>inactive->active |      |      | Transition 6:<br>Inactive->living TX |      |      | Transition 7:<br>Inactive->death/other |      |      |
|-------------------------------------------------|-----------------------------------|------|------|----------------------------------|------|------|--------------------------------------|------|--------|--------------------------------------|------|------|-----------------------------------|------|------|--------------------------------------|------|------|----------------------------------------|------|------|
|                                                 | Coef                              | SE   | P    | Coef                             | SE   | P    | Coef                                 | SE   | P      | Coef                                 | SE   | P    | Coef                              | SE   | P    | Coef                                 | SE   | P    | Coef                                   | SE   | P    |
| Gender (M vs.F)                                 | -0.04                             | 0.02 | 0.02 | 0.05                             | 0.03 | 0.08 | -0.10                                | 0.03 | 0.00   | -0.09                                | 0.05 | 0.08 | 0.05                              | 0.02 | 0.01 | 0.20                                 | 0.05 | 0.00 | 0.09                                   | 0.04 | 0.01 |
| Age                                             | 0.00                              | 0.00 | 0.00 | -0.03                            | 0.00 | 0.00 | 0.00                                 | 0.00 | 0.00   | 0.03                                 | 0.00 | 0.00 | 0.00                              | 0.00 | 0.00 | -0.02                                | 0.00 | 0.00 | 0.02                                   | 0.00 | 0.00 |
| Diabetes (Y vs. N)                              | 0.13                              | 0.02 | 0.00 | -0.34                            | 0.03 | 0.00 | -0.29                                | 0.03 | 0.00   | 0.43                                 | 0.05 | 0.00 | -0.26                             | 0.02 | 0.00 | -0.72                                | 0.06 | 0.00 | 0.10                                   | 0.04 | 0.01 |
| Dialysis (Y vs. N)                              | 0.20                              | 0.02 | 0.00 | -0.76                            | 0.03 | 0.00 | 0.36                                 | 0.03 | 0.00   | 0.01                                 | 0.06 | 0.84 | 0.40                              | 0.02 | 0.00 | -0.14                                | 0.05 | 0.01 | 0.68                                   | 0.04 | 0.00 |
| ABO (AB vs. A)                                  | 0.21                              | 0.04 | 0.00 | 0.25                             | 0.07 | 0.00 | 0.66                                 | 0.05 | 0.00   | -0.06                                | 0.14 | 0.69 | 0.03                              | 0.05 | 0.45 | 0.03                                 | 0.13 | 0.82 | -0.09                                  | 0.10 | 0.36 |
| ABO (B vs. A)                                   | -0.11                             | 0.03 | 0.00 | -0.16                            | 0.05 | 0.00 | -0.36                                | 0.04 | 0.00   | -0.05                                | 0.08 | 0.56 | -0.02                             | 0.03 | 0.40 | -0.15                                | 0.09 | 0.09 | -0.17                                  | 0.06 | 0.01 |
| ABO (O vs. A)                                   | -0.12                             | 0.02 | 0.00 | -0.26                            | 0.03 | 0.00 | -0.49                                | 0.03 | 0.00   | -0.08                                | 0.05 | 0.13 | -0.03                             | 0.02 | 0.15 | -0.14                                | 0.06 | 0.02 | -0.06                                  | 0.04 | 0.11 |
| CPRA (1-79 vs. 0)                               | 0.16                              | 0.03 | 0.00 | -0.08                            | 0.06 | 0.17 | 0.00                                 | 0.08 | 0.99   | -0.25                                | 0.10 | 0.01 | 0.20                              | 0.03 | 0.00 | 0.11                                 | 0.10 | 0.25 | 0.00                                   | 0.07 | 0.95 |
| CPRA (80-90 vs. 0)                              | 0.16                              | 0.10 | 0.10 | -0.50                            | 0.24 | 0.04 | 0.00                                 | 0.22 | 1.00   | 0.16                                 | 0.28 | 0.57 | -0.11                             | 0.11 | 0.30 | -0.18                                | 0.34 | 0.60 | -0.25                                  | 0.24 | 0.31 |
| CPRA (91-100 vs. 0)                             | 0.24                              | 0.07 | 0.00 | -1.39                            | 0.26 | 0.00 | 0.33                                 | 0.12 | 0.01   | 0.26                                 | 0.20 | 0.19 | 0.13                              | 0.07 | 0.09 | -0.65                                | 0.34 | 0.05 | 0.29                                   | 0.14 | 0.04 |
| Region (10 vs. 1)                               | 0.25                              | 0.05 | 0.00 | -0.54                            | 0.08 | 0.00 | 0.62                                 | 0.08 | 0.00   | 0.60                                 | 0.18 | 0.00 | 0.08                              | 0.05 | 0.10 | 0.98                                 | 0.20 | 0.00 | 0.71                                   | 0.11 | 0.00 |
| Region (11 vs. 1)                               | -0.06                             | 0.05 | 0.18 | -0.08                            | 0.06 | 0.21 | 0.39                                 | 0.08 | 0.00   | 0.95                                 | 0.17 | 0.00 | -0.21                             | 0.05 | 0.00 | -0.65                                | 0.24 | 0.01 | 0.19                                   | 0.11 | 0.08 |
| Region (2 vs. 1)                                | 0.04                              | 0.04 | 0.40 | -0.43                            | 0.07 | 0.00 | 0.41                                 | 0.08 | 0.00   | 0.89                                 | 0.17 | 0.00 | 0.08                              | 0.05 | 0.07 | 0.71                                 | 0.20 | 0.00 | 0.54                                   | 0.10 | 0.00 |
| Region (3 vs. 1)                                | -0.08                             | 0.05 | 0.10 | 0.06                             | 0.07 | 0.36 | 0.50                                 | 0.08 | 0.00   | 1.18                                 | 0.17 | 0.00 | -0.02                             | 0.05 | 0.74 | 0.88                                 | 0.21 | 0.00 | 0.61                                   | 0.11 | 0.00 |
| Region (4 vs. 1)                                | -0.39                             | 0.05 | 0.00 | -0.70                            | 0.07 | 0.00 | 0.40                                 | 0.08 | 0.00   | 0.86                                 | 0.17 | 0.00 | -0.57                             | 0.05 | 0.00 | 1.25                                 | 0.19 | 0.00 | -0.07                                  | 0.11 | 0.52 |
| Region (5 vs. 1)                                | 0.73                              | 0.05 | 0.00 | -1.43                            | 0.15 | 0.00 | 0.83                                 | 0.09 | 0.00   | 0.03                                 | 0.25 | 0.92 | 0.16                              | 0.05 | 0.00 | 1.53                                 | 0.20 | 0.00 | 0.15                                   | 0.13 | 0.25 |
| Region (6 vs. 1)                                | 0.08                              | 0.05 | 0.09 | 0.01                             | 0.07 | 0.92 | 0.45                                 | 0.08 | 0.00   | 1.06                                 | 0.17 | 0.00 | -0.04                             | 0.05 | 0.47 | 1.11                                 | 0.20 | 0.00 | 0.48                                   | 0.11 | 0.00 |
| Region (7 vs. 1)                                | 0.51                              | 0.05 | 0.00 | -0.52                            | 0.08 | 0.00 | 0.77                                 | 0.08 | 0.00   | 0.03                                 | 0.21 | 0.88 | 0.58                              | 0.05 | 0.00 | 1.00                                 | 0.21 | 0.00 | 0.48                                   | 0.12 | 0.00 |
| Region (8 vs. 1)                                | -0.66                             | 0.06 | 0.00 | 0.09                             | 0.07 | 0.19 | 0.55                                 | 0.08 | 0.00   | 0.85                                 | 0.18 | 0.00 | -0.23                             | 0.06 | 0.00 | 1.16                                 | 0.20 | 0.00 | -0.19                                  | 0.14 | 0.17 |
| Region (9 vs. 1)                                | 0.59                              | 0.05 | 0.00 | -0.39                            | 0.07 | 0.00 | 0.55                                 | 0.08 | 0.00   | 0.39                                 | 0.19 | 0.04 | 0.20                              | 0.05 | 0.00 | 1.53                                 | 0.19 | 0.00 | 0.60                                   | 0.11 | 0.00 |
| Race (Hispanic vs. Black)                       | 0.03                              | 0.03 | 0.24 | 0.64                             | 0.06 | 0.00 | -0.11                                | 0.04 | 0.00   | 0.06                                 | 0.08 | 0.42 | 0.09                              | 0.03 | 0.01 | 0.70                                 | 0.12 | 0.00 | 0.05                                   | 0.06 | 0.45 |
| Race (Other vs. Black)                          | -0.07                             | 0.04 | 0.04 | 0.43                             | 0.07 | 0.00 | -0.35                                | 0.05 | 0.00   | -0.18                                | 0.10 | 0.08 | 0.16                              | 0.04 | 0.00 | 0.77                                 | 0.14 | 0.00 | -0.16                                  | 0.08 | 0.05 |
| Race (White vs. Black)                          | 0.31                              | 0.02 | 0.00 | 1.22                             | 0.05 | 0.00 | -0.05                                | 0.03 | 0.10   | 0.30                                 | 0.06 | 0.00 | 0.30                              | 0.02 | 0.00 | 1.63                                 | 0.10 | 0.00 | 0.21                                   | 0.05 | 0.00 |
| Interaction CPRA*RACE on transition 3           |                                   |      |      |                                  |      |      |                                      |      | 0.0017 |                                      |      |      |                                   |      |      |                                      |      |      |                                        |      |      |
| CPRA (1-79 vs. 0):<br>Race (Hispanic vs. Black) |                                   |      |      |                                  |      |      | 0.00                                 | 0.15 | 0.98   |                                      |      |      |                                   |      |      |                                      |      |      |                                        |      |      |

|                                                   |  |  |  |  |  |  |       |      |      |  |  |  |  |  |  |  |  |  |  |  |  |
|---------------------------------------------------|--|--|--|--|--|--|-------|------|------|--|--|--|--|--|--|--|--|--|--|--|--|
| CPRA (1-79 vs. 0):<br>Race (Other vs. Black)      |  |  |  |  |  |  | 0.00  | 0.18 | 0.99 |  |  |  |  |  |  |  |  |  |  |  |  |
| CPRA (1-79 vs. 0):<br>Race (White vs. Black)      |  |  |  |  |  |  | -0.02 | 0.10 | 0.83 |  |  |  |  |  |  |  |  |  |  |  |  |
| CPRA (80-90 vs. 0):<br>Race (Hispanic vs. Black)  |  |  |  |  |  |  | 0.55  | 0.42 | 0.19 |  |  |  |  |  |  |  |  |  |  |  |  |
| CPRA (80-90 vs. 0):<br>Race (Other vs. Black)     |  |  |  |  |  |  | 0.96  | 0.42 | 0.02 |  |  |  |  |  |  |  |  |  |  |  |  |
| CPRA (80-90 vs. 0):<br>Race (White vs. Black)     |  |  |  |  |  |  | 0.63  | 0.28 | 0.03 |  |  |  |  |  |  |  |  |  |  |  |  |
| CPRA (91-100 vs. 0):<br>Race (Hispanic vs. Black) |  |  |  |  |  |  | 0.69  | 0.22 | 0.00 |  |  |  |  |  |  |  |  |  |  |  |  |
| CPRA (91-100 vs. 0):<br>Race (Other vs. Black)    |  |  |  |  |  |  | 0.76  | 0.28 | 0.01 |  |  |  |  |  |  |  |  |  |  |  |  |
| CPRA (91-100 vs. 0):<br>Race (White vs. Black)    |  |  |  |  |  |  | 0.58  | 0.16 | 0.00 |  |  |  |  |  |  |  |  |  |  |  |  |
